# Supplementary material for: Purification and Characterization of Recombinant Botulinum Neurotoxin Serotype FA, Also Known as Serotype H
Source: PubMed Central journal article supplement (PMC5983251; doi:10.3390/toxins10050195), 2018-05-11
Supplement: toxins-10-00195-s001.pdf [file toxins-10-00195-s001.pdf]

# Supplementary Materials: Purification and Characterization of Recombinant Botulinum Neurotoxin Serotype FA, Also Known as Serotype H

Gavin Hackett, Kevin Moore, David Burgin, Fraser Hornby, Bryony Gray, Mark Elliott, Imran Mir and Matthew Beard

## Supplemental Figure 1

Page S1

|                  |                                                                           |     |
|------------------|---------------------------------------------------------------------------|-----|
| rBoNT-FA(0)-his  | MPVVINSFNYYDDPVNDNTIIYIRPPYYETSNTYFKAFQIMDNVWIIPERYRLGIDPSLFNPPVSLKAGSD   | 70  |
| mrBoNT-FA(0)-his | MPVVINSFNYYDDPVNDNTIIYIRPPYYETSNTYFKAFQIMDNVWIIPERYRLGIDPSLFNPPVSLKAGSD   | 70  |
| mrBoNT-FA-his    | MPVVINSFNYYDDPVNDNTIIYIRPPYYETSNTYFKAFQIMDNVWIIPERYRLGIDPSLFNPPVSLKAGSD   | 70  |
| rBoNT-FA(0)-his  | GYFDPNYLSTNTEKNKYLQIMIKLFKRINSKPAGQILLEEKNAIPYLGNSYQEEQFTTNNRTVSFNVK      | 140 |
| mrBoNT-FA(0)-his | GYFDPNYLSTNTEKNKYLQIMIKLFKRINSKPAGQILLEEKNAIPYLGNSYQEEQFTTNNRTVSFNVK      | 140 |
| mrBoNT-FA-his    | GYFDPNYLSTNTEKNKYLQIMIKLFKRINSKPAGQILLEEKNAIPYLGNSYQEEQFTTNNRTVSFNVK      | 140 |
| rBoNT-FA(0)-his  | LANGNIVQQMANLI IWGPGPDLTTNKGGIIYSPYQSMEATPYKDGFGSMTVEFSPEYATAFNDISIAS     | 210 |
| mrBoNT-FA(0)-his | LANGNIVQQMANLI IWGPGPDLTTNKGGIIYSPYQSMEATPYKDGFGSMTVEFSPEYATAFNDISIAS     | 210 |
| mrBoNT-FA-his    | LANGNIVQQMANLI IWGPGPDLTTNKGGIIYSPYQSMEATPYKDGFGSMTVEFSPEYATAFNDISIAS     | 210 |
| rBoNT-FA(0)-his  | HSPSLFIKDPALILMHQLIYVLHGLYGYITEYKIPNVVQSYMKVTKPITSAEFLTFGGRDRNIVPQSI      | 280 |
| mrBoNT-FA(0)-his | HSPSLFIKDPALILMHQLIYVLHGLYGYITEYKIPNVVQSYMKVTKPITSAEFLTFGGRDRNIVPQSI      | 280 |
| mrBoNT-FA-his    | HSPSLFIKDPALILMHELIHVLHGLYGYITEYKIPNVVQSYMKVTKPITSAEFLTFGGRDRNIVPQSI      | 280 |
| rBoNT-FA(0)-his  | QSQLYNKVLSYKRIASRLNKVNTATALINIDEFKNLYEWKYQFAKDSNGVYSVDLNKFEQLYKKIYSFT     | 350 |
| mrBoNT-FA(0)-his | QSQLYNKVLSYKRIASRLNKVNTATALINIDEFKNLYEWKYQFAKDSNGVYSVDLNKFEQLYKKIYSFT     | 350 |
| mrBoNT-FA-his    | QSQLYNKVLSYKRIASRLNKVNTATALINIDEFKNLYEWKYQFAKDSNGVYSVDLNKFEQLYKKIYSFT     | 350 |
| rBoNT-FA(0)-his  | EFNLAYEFKIKTRLGYLAENFGPFYLPNLLDDSIYTEVDGFNIGALSINYQGQNGSDINSIKKLQGGV      | 420 |
| mrBoNT-FA(0)-his | EFNLAYEFKIKTRLGYLAENFGPFYLPNLLDDSIYTEVDGFNIGALSINYQGQNGSDINSIKKLQGGV      | 420 |
| mrBoNT-FA-his    | EFNLAYEFKIKTRLGYLAENFGPFYLPNLLDDSIYTEVDGFNIGALSINYQGQNGSDINSIKKLQGGV      | 420 |
| rBoNT-FA(0)-his  | VSRVVRLCNSNSN-TKN--S---LCITVNNRDLFFIASQESYAGENTINTYKEIDDTTTLDPSPFEDILDKVI | 484 |
| mrBoNT-FA(0)-his | VSRVVRLCNSVI PRKGTKAPPRLCITVNNRDLFFIASQESYAGENTINTYKEIDDTTTLDPSPFEDILDKVI | 490 |
| mrBoNT-FA-his    | VSRVVRLCNSVI PRKGTKAPPRLCITVNNRDLFFIASQESYAGENTINTYKEIDDTTTLDPSPFEDILDKVI | 490 |
| rBoNT-FA(0)-his  | LNFEQVIVQMPNRRVSTDIQKDNYPKYDYNRTDIIDSYEVRNYNTFFYLNAQKFSNPESNITLTSSF       | 554 |
| mrBoNT-FA(0)-his | LNFEQVIVQMPNRRVSTDIQKDNYPKYDYNRTDIIDSYEVRNYNTFFYLNAQKFSNPESNITLTSSF       | 560 |
| mrBoNT-FA-his    | LNFEQVIVQMPNRRVSTDIQKDNYPKYDYNRTDIIDSYEVRNYNTFFYLNAQKFSNPESNITLTSSF       | 560 |

# Supplemental Figure 1

|                  |                                                                                |      |
|------------------|--------------------------------------------------------------------------------|------|
| rBoNT-FA(0)-his  | DTGLEGSKVYTFSSDFINNINKPVQALLFIEWVKQVIRDFTTEATKTSTVDKDKDISLVVPI IGLALN          | 624  |
| mrBoNT-FA(0)-his | DTGLEGSKVYTFSSDFINNINKPVQALLFIEWVKQVIRDFTTEATKTSTVDKDKDISLVVPI IGLALN          | 630  |
| mrBoNT-FA-his    | DTGLEGSKVYTFSSDFINNINKPVQALLFIEWVKQVIRDFTTEATKTSTVDKDKDISLVVPI IGLALN          | 630  |
| rBoNT-FA(0)-his  | IGDEIYKQHFAEAVELVGAGLLEFSPEFLIPTLLIFTIKGYLTGSIRDKDKI IKTLDNALNVRDQKWKE         | 694  |
| mrBoNT-FA(0)-his | IGDEIYKQHFAEAVELVGAGLLEFSPEFLIPTLLIFTIKGYLTGSIRDKDKI IKTLDNALNVRDQKWKE         | 700  |
| mrBoNT-FA-his    | IGDEIYKQHFAEAVELVGAGLLEFSPEFLIPTLLIFTIKGYLTGSIRDKDKI IKTLDNALNVRDQKWKE         | 700  |
| rBoNT-FA(0)-his  | LYRWVSKWLTINTQFNKRKEQMYKALKNQATAIKKI IENKYNNTTDEKSKIDSSYNINEIERTLNEK           | 764  |
| mrBoNT-FA(0)-his | LYRWVSKWLTINTQFNKRKEQMYKALKNQATAIKKI IENKYNNTTDEKSKIDSSYNINEIERTLNEK           | 770  |
| mrBoNT-FA-his    | LYRWVSKWLTINTQFNKRKEQMYKALKNQATAIKKI IENKYNNTTDEKSKIDSSYNINEIERTLNEK           | 770  |
| rBoNT-FA(0)-his  | INLAMKNI EQFITESS IAYLINI INNETIQKLSYDDLVRRYLLGYIRNHSSILGNSVEELNSKVNHL D       | 834  |
| mrBoNT-FA(0)-his | INLAMKNI EQFITESS IAYLINI INNETIQKLSYDDLVRRYLLGYIRNHSSILGNSVEELNSKVNHL D       | 840  |
| mrBoNT-FA-his    | INLAMKNI EQFITESS IAYLINI INNETIQKLSYDDLVRRYLLGYIRNHSSILGNSVEELNSKVNHL D       | 840  |
| rBoNT-FA(0)-his  | NGIPFELSSYTND SLLIRYFNKNY GELKYNCLINIKYEMDRDKLVDSSGYRSRINIGTGKVFSEIDKNQV       | 904  |
| mrBoNT-FA(0)-his | NGIPFELSSYTND SLLIRYFNKNY GELKYNCLINIKYEMDRDKLVDSSGYRSRINIGTGKVFSEIDKNQV       | 910  |
| mrBoNT-FA-his    | NGIPFELSSYTND SLLIRYFNKNY GELKYNCLINIKYEMDRDKLVDSSGYRSRINIGTGKVFSEIDKNQV       | 910  |
| rBoNT-FA(0)-his  | QLSNLESSKIEVILNNGVIYNSMYENFSTFWIRIPKYFRNINNEYKI ISCMQNNSGWEVSLNFSNMNSK         | 974  |
| mrBoNT-FA(0)-his | QLSNLESSKIEVILNNGVIYNSMYENFSTFWIRIPKYFRNINNEYKI ISCMQNNSGWEVSLNFSNMNSK         | 980  |
| mrBoNT-FA-his    | QLSNLESSKIEVILNNGVIYNSMYENFSTFWIRIPKYFRNINNEYKI ISCMQNNSGWEVSLNFSNMNSK         | 980  |
| rBoNT-FA(0)-his  | IIWTLQDTEGIKKT VV FQYTQ NINISDY INRWIFVTITNNRLS NSKIY INGRLINEESISDLGN I HASNN | 1044 |
| mrBoNT-FA(0)-his | IIWTLQDTEGIKKT VV FQYTQ NINISDY INRWIFVTITNNRLS NSKIY INGRLINEESISDLGN I HASNN | 1050 |
| mrBoNT-FA-his    | IIWTLQDTEGIKKT VV FQYTQ NINISDY INRWIFVTITNNRLS NSKIY INGRLINEESISDLGN I HASNN | 1050 |
| rBoNT-FA(0)-his  | IMFKLDGCRDPHRYIWI KYFNLF DKELNKKEIKDLYDNQSN SGI LKDFWGDYLYQDKPYYMLNLYDPNKY     | 1114 |
| mrBoNT-FA(0)-his | IMFKLDGCRDPHRYIWI KYFNLF DKELNKKEIKDLYDNQSN SGI LKDFWGDYLYQDKPYYMLNLYDPNKY     | 1120 |
| mrBoNT-FA-his    | IMFKLDGCRDPHRYIWI KYFNLF DKELNKKEIKDLYDNQSN SGI LKDFWGDYLYQDKPYYMLNLYDPNKY     | 1120 |

# Supplemental Figure 1

|                  |                                                                                                           |      |
|------------------|-----------------------------------------------------------------------------------------------------------|------|
| rBoNT-FA(0)-his  | LDVNNVGIRGYMYLKGPRGRIVTTNI YLNSTLYMGTKFI IKKYASGNKDNIVRNNDRVYINVVVKNKEYR                                  | 1184 |
| mrBoNT-FA(0)-his | LDVNNVGIRGYMYLKGPRGRIVTTNI YLNSTLYMGTKFI IKKYASGNKDNIVRNNDRVYINVVVKNKEYR                                  | 1190 |
| mrBoNT-FA-his    | LDVNNVGIRGYMYLKGPRGRIVTTNI YLNSTLYMGTKFI IKKYASGNKDNIVRNNDRVYINVVVKNKEYR                                  | 1190 |
| rBoNT-FA(0)-his  | LATNASQAGVEKILSAVEIPDVGNLSQVVVMKSENDQGIRNKCKMNLQDNNNGNDIGFIGFHQFN NIAKLV                                  | 1254 |
| mrBoNT-FA(0)-his | LATNASQAGVEKILSAVEIPDVGNLSQVVVMKSENDQGIRNKCKMNLQDNNNGNDIGFIGFHQFN NIAKLV                                  | 1260 |
| mrBoNT-FA-his    | LATNASQAGVEKILSAVEIPDVGNLSQVVVMKSENDQGIRNKCKMNLQDNNNGNDIGFIGFHQFN NIAKLV                                  | 1260 |
| rBoNT-FA(0)-his  | ASNWYNRQIGKASRTFGCSWEFIPVDDGWGESSL <span style="border: 1px solid black; padding: 2px;">HHHHHHHHHH</span> | 1298 |
| mrBoNT-FA(0)-his | ASNWYNRQIGKASRTFGCSWEFIPVDDGWGESSL <span style="border: 1px solid black; padding: 2px;">HHHHHHHHHH</span> | 1304 |
| mrBoNT-FA-his    | ASNWYNRQIGKASRTFGCSWEFIPVDDGWGESSL <span style="border: 1px solid black; padding: 2px;">HHHHHHHHHH</span> | 1304 |

**Figure S1.** Multiple sequence alignment of rBoNT/FA(0)-his, mrBoNT/FA(0)-his, and mrBoNT/FA-his. Positions of the E227Q and H230Y catalytic site inactivating mutations, the S429 to L437 activation loop substitution, and C-terminal ten-histidine affinity tag, are boxed in grey.

MPVIVNSFNYYDDPVDNDNTIIYIRPPYYETSNTYFKAQIMDNVWIIIPERYRLGIDPSLFNPPVSLKAGSDGYFDPNYLSTNTEKNKYLQIMIKLFRINSKPAGQIILEEIKNAIPYLGNSYTQEEQFTTNNRTVSFNVKLANGNIVQQMANLI IWGPGDPLTNTKGGI IYSPYQSMEATPYKDFGFSIMTVEFSPEYATAFNDISIASHSPSLFKDPALILMHELIVLHGLYGYITTEYKITPNVVQSYMVKTPITSAEFLTFGGRDRNIVPQSIQSQLYNKVLSYKRIASRLNKVNTATALINI DEFKNLYEWKYQFAKDSNGVYSVDLNKFEQLYKKIYSFTEFNLAYEFKIKTRLGYLEAENFGPFYLPNLLDDSIYTEVDGFGNIGALSINYQGQNIGSDINSIKKLQGGQGVVSRVRLC<sub>428</sub>KSVIPRKGTKAPPRLC<sub>444</sub>ITVNNRDLFFIASQESYGEINTYKEIDDTTTLDPSEFEDILDKVILNFNQVVPQMPNRRVSTDIQKDNYPKYDYNRTDIIDSYEVGRNYNTFFYLNAQKFSPNESNITLTSFDTGLEGSKVYTFSSDFINNINKPVQALLFIEWVKQVIRDFTTEATKTSTVDKLDKDISLVVPIYGLALNIGDEIYKQHFVAEVLVAGLLELFSPEFLIPTLLIFTIKGYLTGSIRDKDKIKITLDNALNVRDQKWKELYRWVSKWLTINTQFNKRKEQMYKALKNQATAIKKI IENKYNNTTDEKSKIDSSYNINEIERTLNEKINLAMKNIEQFITESSIAYLINI INNETIQKLKSYDDLVRRYLLGYIRNHSSILGNSVEELNSKVNHLNNGI PFELSSYTNDLIRYFNKNYGEIKYNCILNIKYEMDRDKLVDSSGYRSRINIGTVKFSEIDKNQVQLSNLESSKIEVILNNGVIYNSMYENFSTSFWRIRIPKYFRNINNEYKILSCMQNNSGWEVSLNFSNMNSKI IWTLQDTEGIKKTVVFQYQYNINISDYINRWIFVTTNNRLSNSKIYINGRLINEESISDLGNIHASNNIMFKLDGCRDPHRYIWKYFNLFDKELNKKELI KDLYDNQSNSGILKDFWGDYLYQYDKPYYMLNLYDPNKYLDVNNVGI RGYMYLKGPRGRIVTNTNIYLNSTLYMGTKFI IKKYASGNKDNI VRNDRVYINVVVKNEYRLATNASQAGVEKILSAVEIPDVGNLSQVVVMKSENDQGIRNKCKMNLQDNNGNDIGFIFGHQFNNAIKLVASNWNRYQIGKASRTFGCSWEFIPVDDGWGESSLHHHHHHHHHH

Light chain, LC/FA  
BoNT/F1 activation loop  
*Translocation domain, H<sub>N</sub>/FA*  
*Unknown function, H<sub>CN</sub>/FA*  
**Receptor binding domain, H<sub>CC</sub>/FA**  
 Affinity tag (His<sub>10</sub>)

**Figure S2.** Primary amino acid sequence of mrBoNT/FA-his. Light chain, LC/FA, amino acids shown in black. Substituted BoNT/F1 activation loop amino acids shown underlined. *Translocation domain, H<sub>N</sub>/FA*, amino acids shown in grey italic. *Unknown function, H<sub>CN</sub>/FA*, amino acids shown in black italic. **Receptor binding domain, H<sub>CC</sub>/FA**, amino acids shown in bold black italic. Affinity tag (His<sub>10</sub>), amino acids shown in grey.

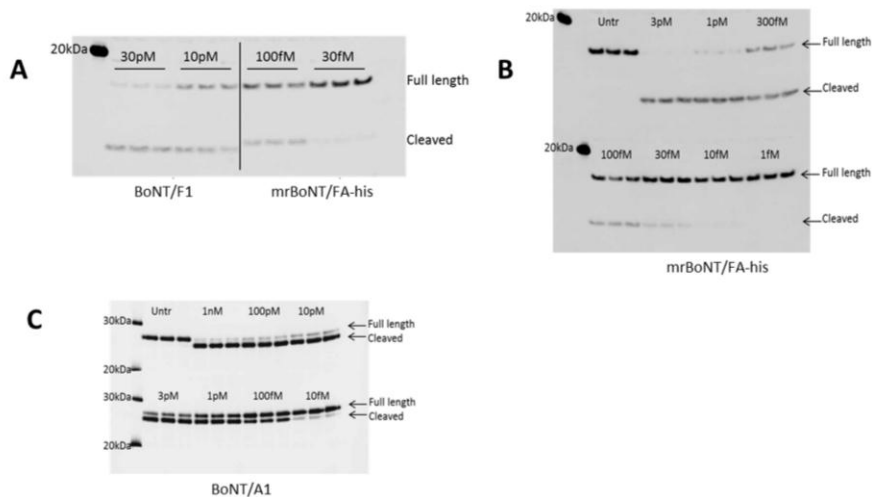

**Figure S3.** SNARE cleavage in rat cortical neurons panel (A) shows Western blot analysis of full-length and cleaved VAMP-2 from rat cortical neurons treated with nBoNT/F1 or mrBoNT/FA-his for 24 hours. Panel (B) shows Western blot analysis of full-length and cleaved VAMP-2 from rat cortical neurons treated with a concentration range of mrBoNT/FA-his for 24 hours. Panel (C) shows Western blot analysis of full-length and cleaved SNAP-25 from rat cortical neurons treated with a concentration range of nBoNT/A1 for 24 hours.
